# Supplementary material
Source: PubMed Central journal article supplement (PMC1783357)
Supplement: pnas_0610294104_2.pdf [file pnas_0610294104_2.pdf]

Table 1. Tandem mass spectrometric sequencing of a peptide containing the pyrrolysyl residue from recombinant MtmB1 synthesized by *E. coli* expressing *pylTSBCD*.

| Sequence | b-series ions   |                     |                                                    | a-series ions   |                     |                                                    | y-series ions   |                     |                                                    |
|----------|-----------------|---------------------|----------------------------------------------------|-----------------|---------------------|----------------------------------------------------|-----------------|---------------------|----------------------------------------------------|
|          | Ion designation | Measured <i>m/z</i> | $\Delta m$ between ion and preceding ion in series | Ion designation | Measured <i>m/z</i> | $\Delta m$ between ion and preceding ion in series | Ion designation | Measured <i>m/z</i> | $\Delta m$ between ion and preceding ion in series |
| Ala      |                 |                     |                                                    |                 |                     |                                                    |                 |                     |                                                    |
| Gly      | b-2             | 129.11              |                                                    |                 |                     |                                                    |                 |                     |                                                    |
| Arg      | b-3             | 285.16              | <b>156.05</b>                                      |                 |                     |                                                    |                 |                     |                                                    |
| Pro      | b-4             | 382.18              | <b>97.03</b>                                       |                 |                     |                                                    | y-12            | 1281.63             |                                                    |
| Gly      |                 |                     |                                                    |                 |                     |                                                    |                 |                     |                                                    |
| Met      | b-6             | 570.28              | <b>188.10 (G+M)</b>                                |                 |                     |                                                    |                 |                     |                                                    |
| Gly      | b-7             | 627.30              | <b>57.02</b>                                       |                 |                     |                                                    |                 |                     |                                                    |
| Val      | b-8             | 726.38              | <b>99.08</b>                                       | a-8             | 698.37              |                                                    |                 |                     |                                                    |
| Pyl      | b-9             | 963.53              | <b>237.15</b>                                      | a-9             | 935.54              | <b>237.17</b>                                      | y-7             | 840.44              | <b>237.12</b>                                      |
| Gly      | b-10            | 1020.54             | <b>57.01</b>                                       | a-10            | 992.55              | <b>57.01</b>                                       | y-6             | 603.32              | <b>57.04</b>                                       |
| Pro      | b-11            | 559.30 <sup>+</sup> | <b>97.06</b>                                       |                 |                     |                                                    | y-5             | 546.28              | <b>226.10 (E+P)</b>                                |
| Glu      | b-12            | 1246.66             | <b>129.06</b>                                      | a-12            | 1218.64             | <b>226.09 (P+E)</b>                                |                 |                     |                                                    |
| Thr      | b-13            | 674.35 <sup>+</sup> | <b>101.04</b>                                      |                 |                     |                                                    | y-3             | 320.18              | <b>101.08</b>                                      |
| Ser      | b-14            | 717.87 <sup>+</sup> | <b>87.04</b>                                       |                 |                     |                                                    | y-2             | 219.10              | <b>87.00</b>                                       |
| Leu      |                 |                     |                                                    |                 |                     |                                                    | y-1             | 132.10              |                                                    |

In gel-chromatrypsin digestion of the urea-solubilized 50-kDa recombinant MtmB1 protein produced a peptide of  $m/z=783.5$  for the doubly charged ion, which was then subjected to collision-induced dissociation (CID) mass spectrometry. The observed masses for the b-ion (N-terminal ion from peptide bond dissociation), y-ion (C-terminal ion from peptide bond dissociation), and a-ion (N-terminal ion from alpha and carbonyl carbon bond dissociation) series given above were all within 0.05 Da of the predicted masses for the MtmB peptide with sequence AGRPGMGVOGPETSL (where O=pyrrolysine). Bolded numbers highlight the individual masses of peptide residues as calculated by the difference in masses of an ion and the preceding ion within each series. Where an ion in a series

was not identified, the calculated  $\Delta m$  of the flanking ions reveals the summed mass of the two residues indicated in parenthesis. The observed mass of the pyrrolysyl residue calculated from the indicated a-, b-, and y-ions averaged 237.15 Da. The predicted mass of the pyrrolysine residue is 237.16 Da.
