# Supplementary material
Source: PubMed Central journal article supplement (PMC1783357)
Supplement: pnas_0610294104_3.pdf [file pnas_0610294104_3.pdf]

Table 2. Plasmids and primers used in this study.

| Plasmid     | Description                                                                                                                                                           |
|-------------|-----------------------------------------------------------------------------------------------------------------------------------------------------------------------|
| pACYC-Duet1 | Cam <sup>R</sup> expression vector, P15A origin                                                                                                                       |
| pK09        | <i>pylB</i> PCR fragment (using primers PylBNdeI and PylBBglII) cloned into TOPO 2.1 NcoI site removed from <i>pylB</i> (using primers pylBNcoImut1 and pylBNcoImut2) |
| pK11        | Nde I / Bgl II <i>pylB</i> fragment from pK09 cloned into Nde I / Bgl II-cut pACYC-Duet1                                                                              |
| pK12        | Nco I / BamH I-cut <i>pylCD</i> PCR fragment (using primers PylCDNcoI and PylCDBamHI) cloned into Nco I / BamH I-cut pK11                                             |
| pK13        | Nco I site removed from <i>pylC</i> (using primers pylCNcoImut1 and pylCNcoImut2) in pK12                                                                             |
| pK14        | Nco I / BamH I-cut <i>pylD</i> PCR fragment (using primers PylDNcoI and PylCDBamHI) cloned into Nco I / BamH I-cut pK11                                               |
| pK15        | Nco I / BamH I-cut <i>pylCD</i> PCR fragment (using primers PylCDNcoI and PylCDBamHI) cloned into Nco I / BamH I-cut pACYC                                            |
| pK16        | Mlu I / BamH I-cut <i>pylC</i> PCR fragment (using primers PylCMluI and PylCDBamHI) cloned into Mlu I / BamH I-cut pK11                                               |
| Primers     | Sequence                                                                                                                                                              |
| PylBNdeI    | <b>CATATGATCAAAAAAATGGCAACCGAGGACC</b>                                                                                                                                |
| PylBBglII   | <b>AGATCTTTAGCACCTCAGGACAGTTTCG</b>                                                                                                                                   |
| PylCDNcoI   | <b>CCATGGAAACCATATGCCTTATAGGCGGG</b>                                                                                                                                  |
| PylCDBamHI  | <b>GGATCCTTACAGGATAGAATACAGCATGGA</b>                                                                                                                                 |
| PylCBamHI   | <b>GGATCCTTACACAGCCGCTCCGAAG</b>                                                                                                                                      |
| PylDNcoI    | <b>CCATGGCACTTTTAACCCCGGAAG</b>                                                                                                                                       |

|              |                                                                |
|--------------|----------------------------------------------------------------|
| PylCMluI     | <b>ACGCGTTGCGCGAGAAGATTGTGC</b>                                |
| pylBNcoImut1 | CATGATCGACCTGACGATGGGAGAAGACCC                                 |
| pylBNcoImut2 | GGGTCTTTCTCCCATCGTCAGGTCGATCATG                                |
| pylCNcoImut1 | CTTTAATAAGGAGATATACCATGAAAACCATATGCCTTATAGGCGG                 |
| pylCNcoImut2 | CCGCCTATAAGGCATATGGTTTT <b>C</b> ATGGTATATCTCCTTATTAAAG        |
| pBADF        | CTAGCATAACCCCTTGGGGCCTCTAAACGGGTCTTGGCCGTCAATTG<br>TCTGATTCGTT |
| pBADR        | <b>CATATGTGTATATCTCCTGCTAGCCCAAAAAACGGGTA</b>                  |
| UTAGF        | GGGCGAACAGTTCCTGATTAACCACTAGCCGTTCTACTTTACTGG                  |
| UTAGR        | CCAGTAAAGTAGAACGGCTAGTGGTTAATCAGGAACTGTTCGCCC                  |

---

Bolded sequence indicates sequence introducing restriction site into the resulting PCR product.
